# Supplementary material for: Phytochemistry of Three Ecuadorian Lamiaceae: Lepechinia heteromorpha (Briq.) Epling, Lepechinia radula (Benth.) Epling and Lepechinia paniculata (Kunth) Epling
Source: PubMed Central journal article supplement (PMC6358884; doi:10.3390/plants8010001), 2018-12-20
Supplement: plants-08-00001-s001.pdf [file plants-08-00001-s001.pdf]

## Supplementary material

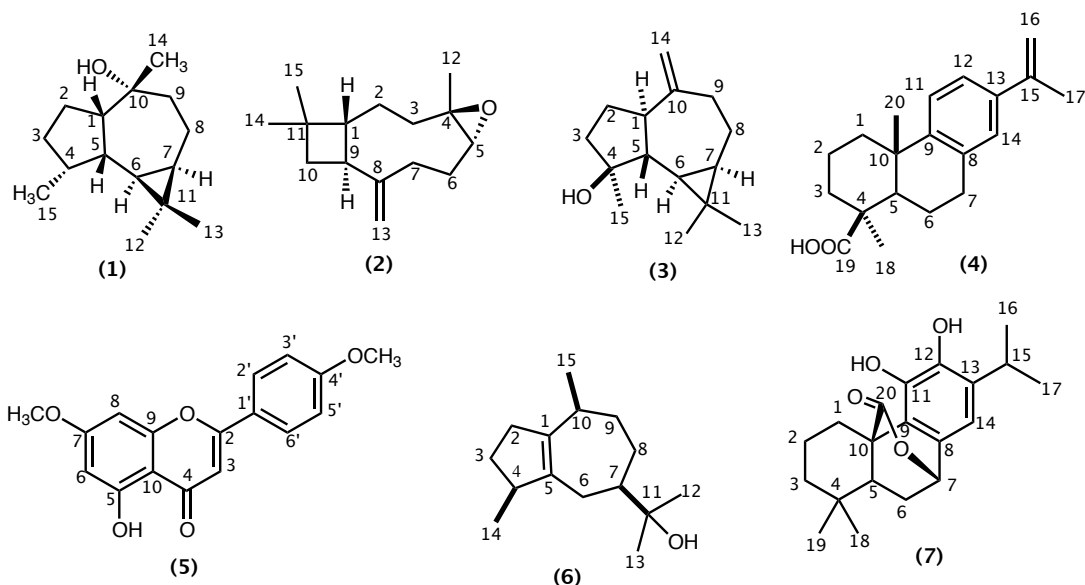

(-)-Ledol (**1**);  $C_{15}H_{26}O$ ; waxy white powder.  $[\alpha]_D^{20} = -5.1$  (c 1.0 in  $CHCl_3$ ). EIMS  $m/z$  (%) = 222 (3, M), 204 (53), 189 (40), 162 (24), 161 (100), 149 (18), 148 (33), 147 (53), 136 (10), 135 (21), 134 (14), 133 (52), 123 (16), 122 (56), 121 (45), 120 (19), 119 (61), 117 (13), 115 (10), 111 (18), 109 (46), 108 (26), 107 (83), 106 (26), 105 (92), 96 (12), 95 (39), 94 (21), 93 (70), 92 (16), 91 (76), 83 (13), 82 (23), 81 (51), 80 (11), 79 (54), 77 (35), 69 (41), 67 (37), 65 (13), 55 (35), 53 (17).  $^1H$  NMR: see Table S1.  $^{13}C$  NMR: see Table S2.

(-)-Caryophyllene oxide (**2**);  $C_{15}H_{24}O$ ; colourless liquid. EIMS  $m/z$  (%) = 220 (4, M), 205 (13), 202 (16), 187 (34), 177 (16), 174 (10), 173 (10), 164 (20), 163 (15), 162 (12), 161 (48), 159 (33), 149 (32), 147 (22), 146 (20), 145 (29), 138 (20), 137 (12), 136 (31), 135 (35), 134 (15), 133 (31), 132 (12), 131 (60), 129 (10), 123 (32), 122 (19), 121 (61), 120 (29), 119 (41), 118 (14), 117 (25), 115 (12), 111 (11), 110 (18), 109 (48), 108 (38), 107 (82), 107 (30), 105 (73), 97 (11), 96 (28), 95 (67), 94 (35), 93 (95), 92 (25), 91 (94), 84 (10), 83 (24), 82 (30), 81 (62), 80 (21), 79 (100), 78 (15), 77 (56), 71 (25), 70 (12), 69 (71), 68 (18), 67 (46), 65 (21), 55 (51), 53 (30).  $^1H$  NMR: see Table S1.  $^{13}C$  NMR: see Table S2.

Spathulenol (**3**),  $C_{15}H_{24}O$ ; white powder. EIMS  $m/z$  (%) = 220 (15, M), 205 (61), 202 (26), 187 (26), 177 (17), 162 (39), 160 (12), 159 (43), 149 (19), 147 (33), 146 (24), 145 (21), 135 (16), 134 (15), 133 (22), 131 (23), 121 (23), 120 (17), 119 (57), 117 (17), 109 (14), 107 (36), 106 (25), 105 (40), 95 (23), 94 (13), 93 (48), 92 (13), 91 (50), 83 (10), 82 (19), 81 (23), 79 (35), 77 (19), 71 (21), 69 (35), 67 (28), 55 (27), 53 (15), 43 (100), 41 (63).  $^1H$  NMR: see table 1.

Angustanoic acid E (**4**);  $C_{22}H_{26}O_2$ ; white powder. ESI-MS  $m/z = 323$   $[M+1]$ .  $[\alpha]_D^{20} = +102.3$  (c 0.6 in  $CHCl_3$ ).  $^1H$  NMR: see Table S1.  $^{13}C$  NMR: see Table S2.

5-hydroxy-4',7-dimethoxy flavone (**5**);  $C_{17}H_{14}O_5$ ; yellowish crystals. ESI-MS  $m/z = 299$   $[M+1]$ .  $^1H$  NMR: see Table S1.  $^{13}C$  NMR: see Table S2.

(-)-Carnosol (**7**);  $C_{20}H_{26}O_4$ ; white crystals. ESI-MS  $m/z = 331$   $[M + 1]$ .  $[\alpha]_D^{20} = -63.0$  (c 0.75 in MeOH).  $^1H$  NMR: see table S1.  $^{13}C$  NMR: see table S2.

**Table S1.** <sup>1</sup>H NMR spectroscopic data for compounds **1-5** and **7** (400 MHz, δ ppm, CDCl<sub>3</sub>).

| Position | 1                                            | 2                                             | 3                                                      | 4                                                             | 5                                                                        | 7                                                                                             |
|----------|----------------------------------------------|-----------------------------------------------|--------------------------------------------------------|---------------------------------------------------------------|--------------------------------------------------------------------------|-----------------------------------------------------------------------------------------------|
| 1        | 2.08 (1H, ddd, <i>J</i> = 9.2, 9.2, 6.4 Hz)  | 1.75 (1H, ddd, <i>J</i> = 10.3, 10.3, 4.2 Hz) | 0.47 (1H, dd, <i>J</i> = 9.6, 11.6 Hz)                 | 1.38 (1H, ddd, <i>J</i> = 13.2, 13.2, 4.0 Hz)<br>2.28 (1H, m) | -                                                                        | 2.90 (1H, ddd, <i>J</i> = 13.0, 4.8, 1.6 Hz)<br>2.40 (1H, ddd, <i>J</i> = 13.0, 13.0, 4.4 Hz) |
| 2        | 1.69 (1H, m)<br>1.90 (1H, m)                 | 1.45 (1H, m)<br>1.64 (1H, m)                  | 0.71 (1H, m)                                           | 1.62 (1H, m)<br>2.03 (1H, m)                                  | -                                                                        | 1.68 (1H, m)                                                                                  |
| 3        | 1.27 (1H, m)<br>1.71 (1H, m)                 | 2.10 (1H, m)<br>0.95 (1H, m)                  | 1.01 (1H, m)<br>1.96 (1H, m)                           | 1.09 (1H, ddd, <i>J</i> = 13.6, 13.6, 4.4 Hz)<br>2.26 (1H, m) | 6.57 (1H, s)                                                             | 1.55 (1H, ddd, <i>J</i> = 13.4, 4.8, 1.6 Hz)<br>1.28 (1H, ddd, <i>J</i> = 13.4, 13.4, 3.6 Hz) |
| 4        | 1.98 (1H, m)                                 | -                                             | 2.05 (1H, m)<br>2.42 (1H, dd, <i>J</i> = 5.2, 13.6 Hz) | -                                                             | -                                                                        | -                                                                                             |
| 5        | 1.77 (1H, m)                                 | 2.85 (1H, dd, <i>J</i> = 10.6, 4.2 Hz)        | -                                                      | 1.57 (1H, dd, <i>J</i> = 12.0, 1.6 Hz)                        | -                                                                        | 1.73 (1H, dd, <i>J</i> = 10.8, 5.6 Hz)                                                        |
| 6        | 0.33 (1H, dd, <i>J</i> = 9.8, 9.0 Hz)        | 1.35 (1H, m)<br>2.25 (1H, m)                  | 2.20 (1H, m)                                           | 2.19 (1H, dt, <i>J</i> = 6.0, 1.6 Hz)<br>2.06 (1H, m)         | 6.36 (1H, d, <i>J</i> = 2.0 Hz)<br>or<br>6.48 (1H, d, <i>J</i> = 2.0 Hz) | 2.20 (1H, m)<br>1.69 (1H, m)                                                                  |
| 7        | 0.71 (1H, ddd, <i>J</i> = 11.5, 9.0, 5.6 Hz) | 2.10 (1H, m)<br>2.35 (1H, m)                  | 1.64 (1H, m)<br>1.91 (1H, m)                           | 2.80 (1H, m)<br>2.92 (1H, dd, <i>J</i> = 16.8, 5.6 Hz)        | -                                                                        | 5.37 (1H, dd, <i>J</i> = 4.0, 1.6 Hz)                                                         |
| 8        | 1.85 (2H, m)                                 | -                                             | 1.54 (1H, m)<br>1.77 (1H, m)                           | -                                                             | 6.36 (1H, d, <i>J</i> = 2.0 Hz)<br>or<br>6.48 (1H, d, <i>J</i> = 2.0 Hz) | -                                                                                             |
| 9        | 1.71 (1H, m)<br>1.90 (1H, m)                 | 2.60 (1H, dd, <i>J</i> = 10.3, 8.5 Hz)        | -                                                      | -                                                             | -                                                                        | -                                                                                             |
| 10       | -                                            | 1.60 (1H, m)<br>1.69 (1H, m)                  | 1.31 (1H, m)                                           | -                                                             | -                                                                        | -                                                                                             |
| 11       | -                                            | -                                             | -                                                      | 7.22 (1H, d, <i>J</i> = 8.0 Hz)                               | -                                                                        | -                                                                                             |
| 12       | 0.93 (3H, d, <i>J</i> = 6.9 Hz)              | 1.20 (3H, s)                                  | 1.05 (3H, s)                                           | 7.24 (1H, d, <i>J</i> = 8.0 Hz)                               | -                                                                        | -                                                                                             |
| 13       | 1.03 (3H, s)                                 | 4.86 (1H, d, <i>J</i> = 1.2 Hz)               | 1.04 (3H, s)                                           | -                                                             | -                                                                        | -                                                                                             |

|                   |              |                            |                                                          |                                |                                                          |                                                             |
|-------------------|--------------|----------------------------|----------------------------------------------------------|--------------------------------|----------------------------------------------------------|-------------------------------------------------------------|
|                   |              | 4.97 (1H, d, $J = 1.2$ Hz) |                                                          | -                              | -                                                        | -                                                           |
| 14                | 0.98 (3H, s) | 1.01 (3H, s)               | 4.66 (1H, d, $J = 1.3$ Hz)<br>4.68 (1H, d, $J = 1.3$ Hz) | 7.14 (1H, bs)                  | -                                                        | 6.64 (H, s)                                                 |
| 15                | 1.14 (3H, s) | 0.99 (3H, s)               | 1.28 (3H, s)                                             | -                              | -                                                        | 3.08 (1H, sept, $J = 6.8$ Hz)                               |
| 16                | -            | -                          | -                                                        | 5.32 (1H, bs)<br>5.02 (1H, bs) | -                                                        | 1.22 (3H, d, $J = 7.2$ Hz) or<br>1.23 (3H, d, $J = 7.2$ Hz) |
| 17                | -            | -                          | -                                                        | 2.12 (3H, s)                   | -                                                        | 1.22 (3H, d, $J = 7.2$ Hz) or<br>1.23 (3H, d, $J = 7.2$ Hz) |
| 18                | -            | -                          | -                                                        | 1.34 (3H, s)                   | -                                                        | 0.90 (3H, s)                                                |
| 19                | -            | -                          | -                                                        | -                              | -                                                        | 0.86 (3H, s)                                                |
| 20                | -            | -                          | -                                                        | 1.12 (3H, s)                   | -                                                        | -                                                           |
| 2' and 6'         | -            | -                          | -                                                        | -                              | 7.01 (2H, d, $J = 8.8$ Hz) or 7.84 (2H, d, $J = 8.8$ Hz) | -                                                           |
| 3' and 5'         | -            | -                          | -                                                        | -                              | 7.01 (2H, d, $J = 8.8$ Hz) or 7.84 (2H, d, $J = 8.8$ Hz) | -                                                           |
| 4'                | -            | -                          | -                                                        | -                              | -                                                        | -                                                           |
| -OCH <sub>3</sub> | -            | -                          | -                                                        | -                              | 3.88 (3H, s, OCH <sub>3</sub> )                          | -                                                           |
| -OCH <sub>3</sub> | -            | -                          | -                                                        | -                              | 3.89 (3H, s, OCH <sub>3</sub> )                          | -                                                           |
| -OH (12 or 20)    | -            | -                          | -                                                        | -                              | -                                                        | 5.74 (1H, s)                                                |

**Table S2.**  $^{13}\text{C}$  NMR spectroscopic data for compounds 1, 2, 4, 5 and 7 (100 MHz,  $\delta$  ppm,  $\text{CDCl}_3$ ).

| Position | 1    | 2     | 4     | 5     | 7     |
|----------|------|-------|-------|-------|-------|
| 1        | 53.9 | 50.9  | 39.4  | -     | 29.3  |
| 2        | 24.8 | 27.3  | 20.0  | 164.2 | 19.0  |
| 3        | 31.7 | 39.3  | 37.5  | 104.3 | 41.1  |
| 4        | 38.6 | 60.0  | 44.0  | 182.5 | 34.7  |
| 5        | 40.9 | 63.9  | 52.9  | 162.7 | 45.6  |
| 6        | 23.6 | 29.9  | 21.0  | 98.2  | 29.9  |
| 7        | 25.1 | 30.0  | 32.2  | 165.6 | 78.0  |
| 8        | 20.4 | 152.0 | 135.2 | 92.8  | 132.2 |
| 9        | 39.4 | 48.9  | 147.5 | 157.8 | 121.7 |
| 10       | 74.7 | 39.9  | 38.6  | 105.7 | 48.5  |
| 11       | 19.3 | 34.2  | 125.6 | -     | 141.9 |
| 12       | 15.5 | 17.1  | 123.2 | -     | 141.2 |
| 13       | 28.8 | 112.9 | 138.4 | -     | 133.0 |
| 14       | 30.7 | 21.8  | 126.2 | -     | 112.4 |
| 15       | 16.1 | 30.3  | 143.1 | -     | 27.4  |
| 16       | -    | -     | 111.8 | -     | 22.6  |
| 17       | -    | -     | 21.9  | -     | 22.7  |
| 18       | -    | -     | 28.8  | -     | 31.8  |
| 19       | -    | -     | 183.1 | -     | 19.8  |
| 20       | -    | -     | 23.2  | -     | 176.1 |
| 1'       | -    | -     | -     | 123.7 | -     |
| 2'       | -    | -     | -     | 128.2 | -     |
| 3'       | -    | -     | -     | 114.6 | -     |
| 4'       | -    | -     | -     | 162.3 | -     |
| 5'       | -    | -     | -     | 114.6 | -     |
| 6'       | -    | -     | -     | 128.2 | -     |
| 7-OMe    | -    | -     | -     | 55.9  | -     |
| 4'-OMe   | -    | -     | -     | 55.7  | -     |

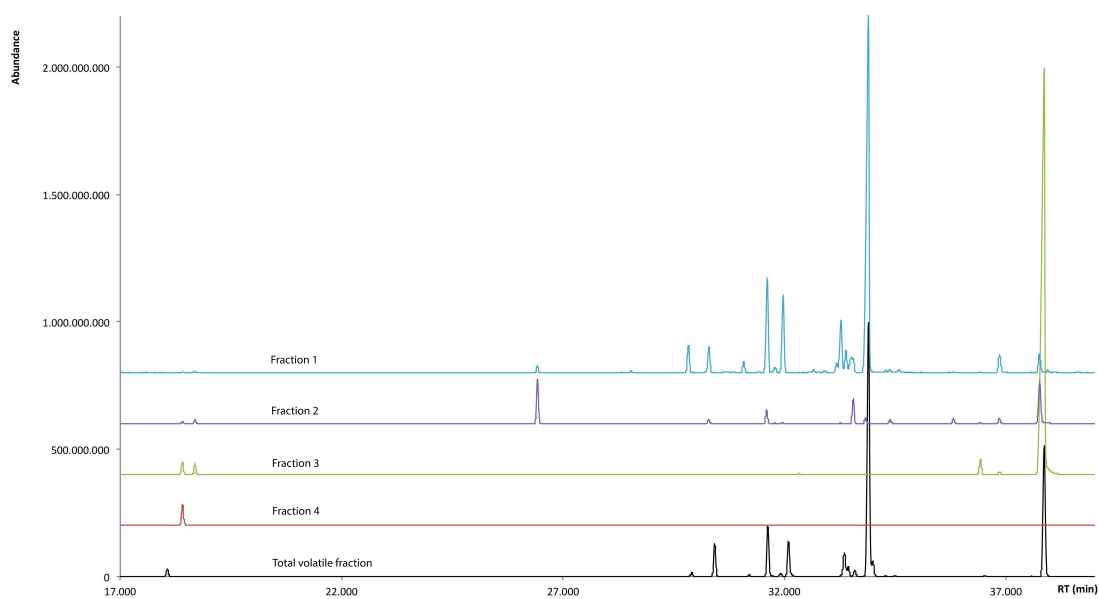

**Figure S1.** GC-MS comparison of fractions from a preparative TLC analysis of *L. heteromorpha* EO. The fractions represent compounds that can be separated by normal phase liquid chromatography.



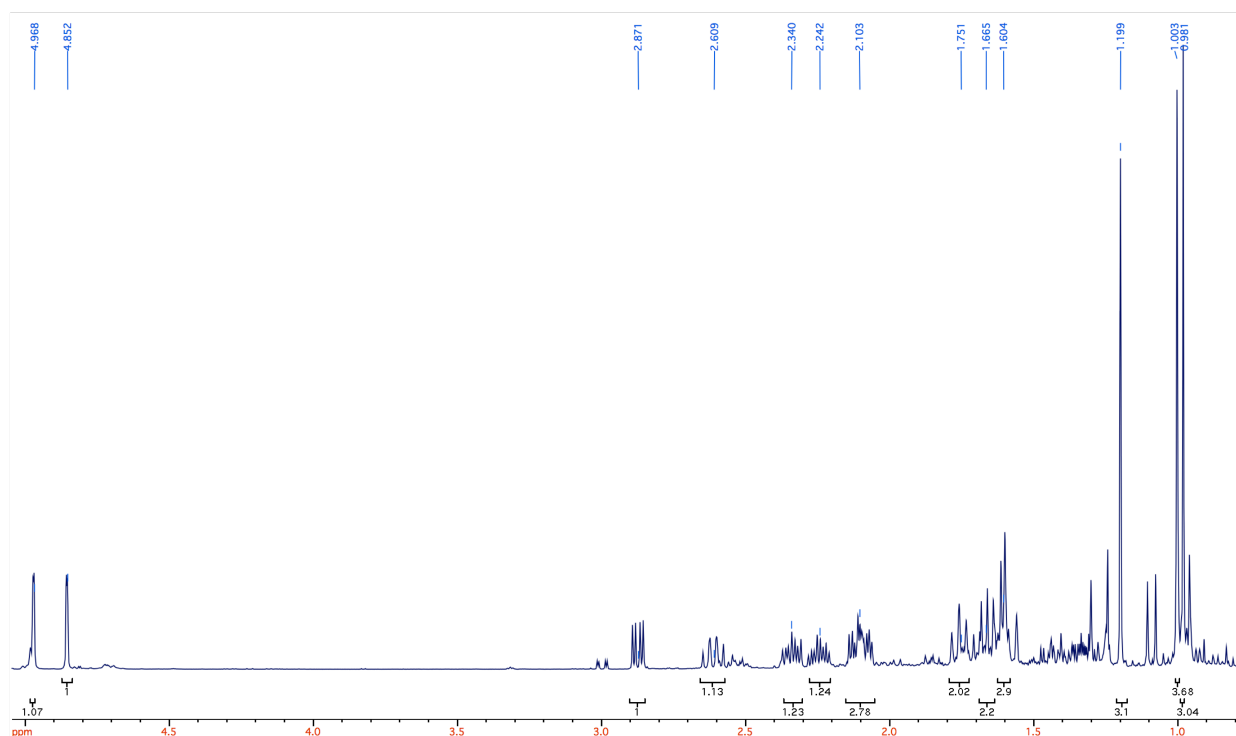

Figure S4. <sup>1</sup>H NMR (400 MHz) spectrum of compound (2) in CDCl<sub>3</sub>

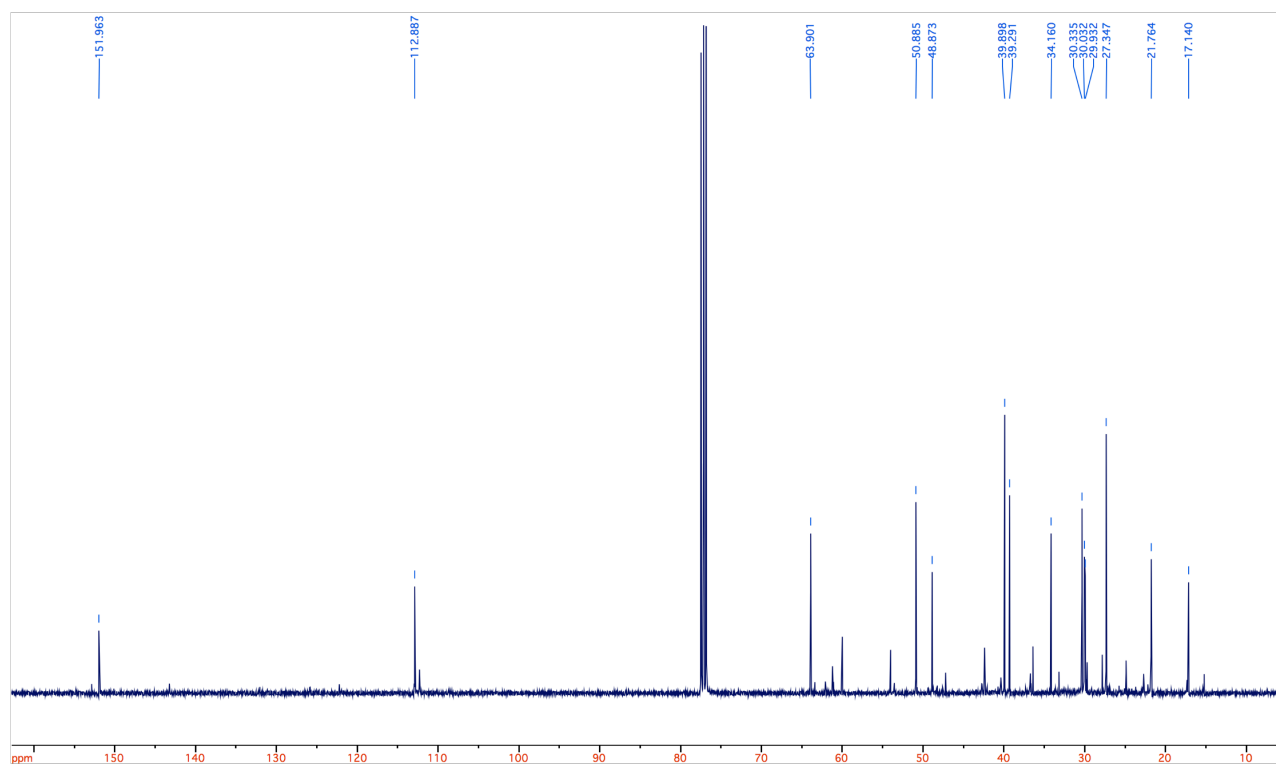

Figure S5. <sup>13</sup>C NMR (100 MHz) spectrum of compound (2) in CDCl<sub>3</sub>

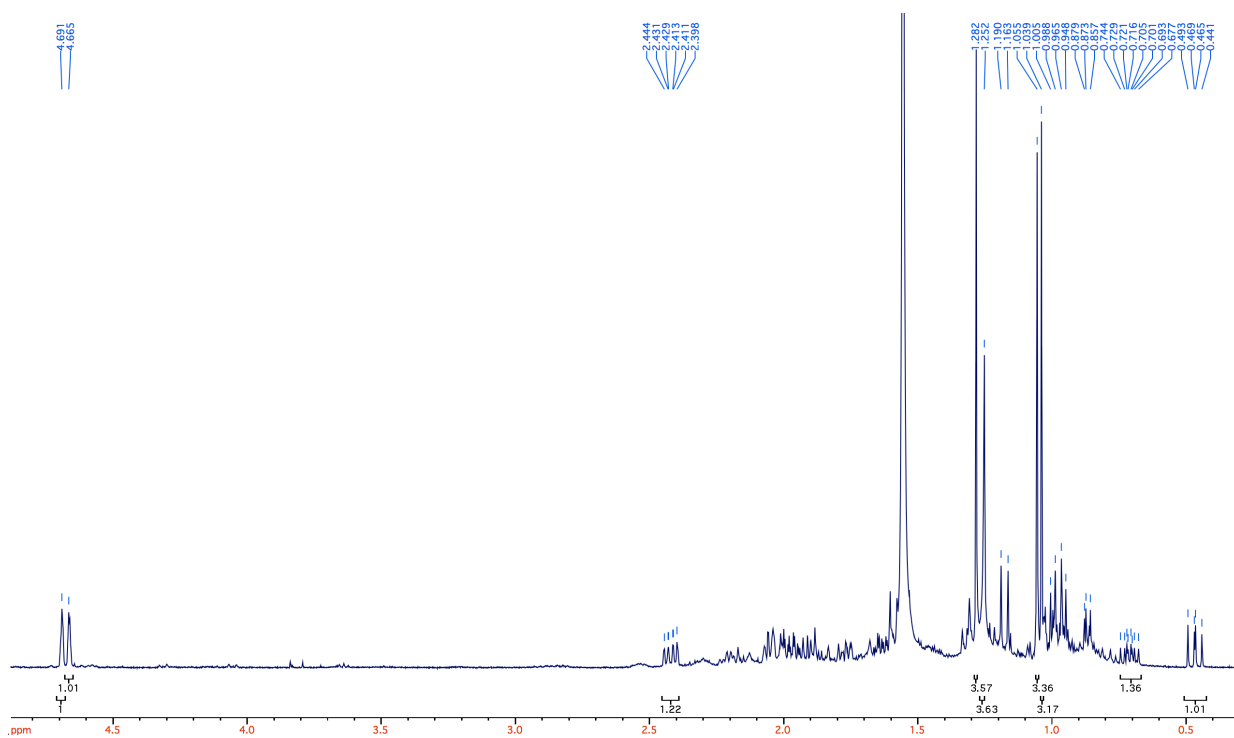

Figure S6. <sup>1</sup>H NMR (400 MHz) spectrum of compound (3) in CDCl<sub>3</sub>

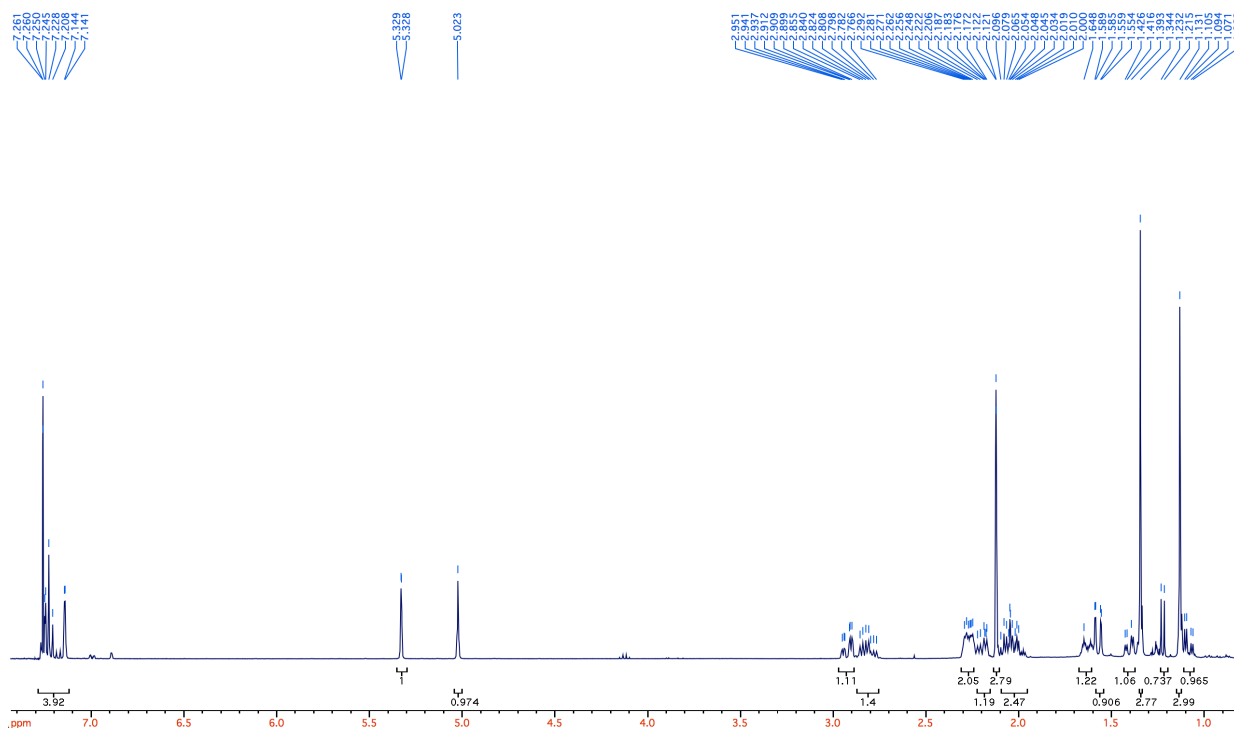

Figure S7. <sup>1</sup>H NMR (400 MHz) spectrum of compound (4) in CDCl<sub>3</sub>

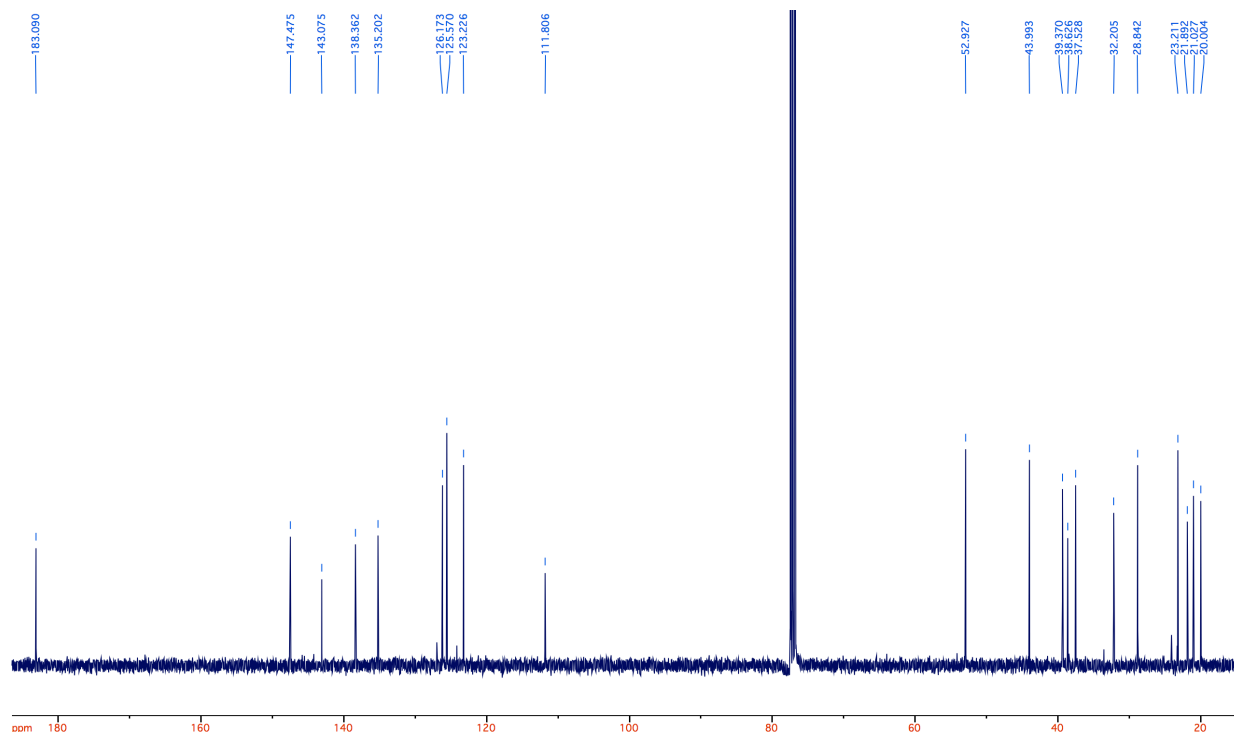

Figure S8.  $^{13}\text{C}$  NMR (100 MHz) spectrum of compound (4) in  $\text{CDCl}_3$

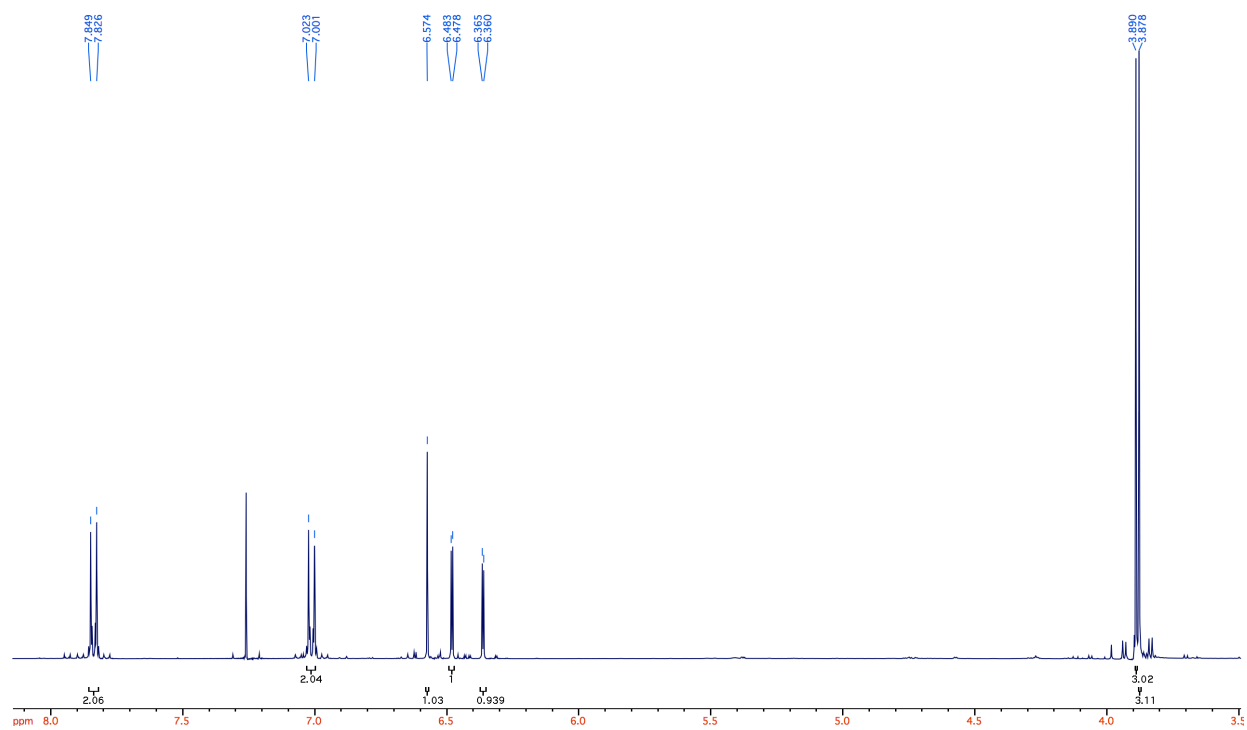

Figure S9.  $^1\text{H}$  NMR (400 MHz) spectrum of compound (5) in  $\text{CDCl}_3$



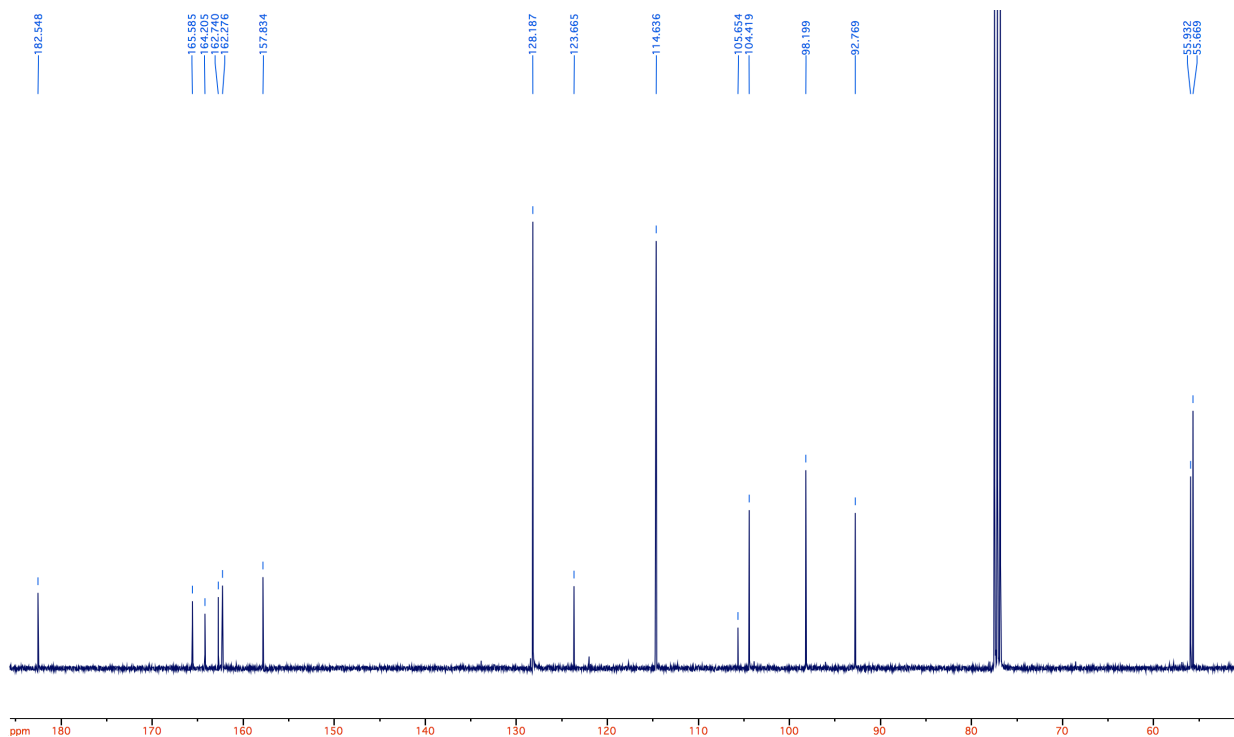

Figure S10.  $^{13}\text{C}$  NMR (100 MHz) spectrum of compound (5) in  $\text{CDCl}_3$

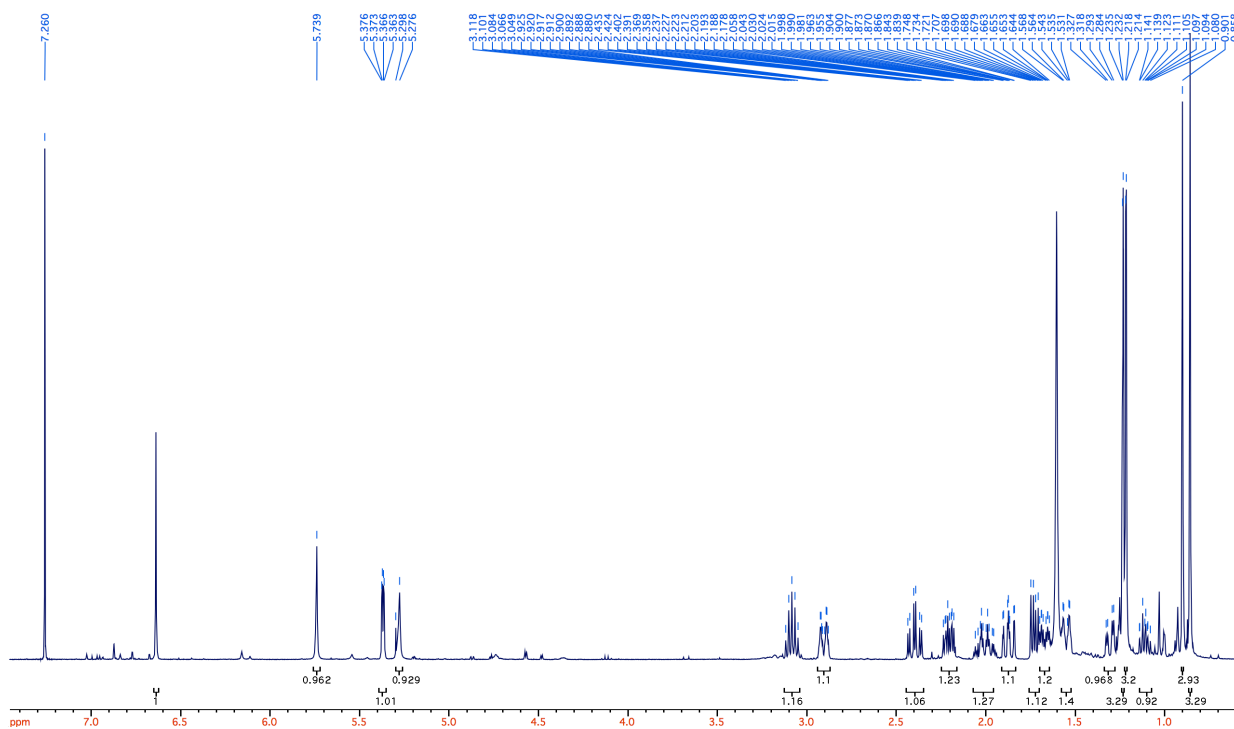

Figure S11.  $^1\text{H}$  NMR (400 MHz) spectrum of compound (7) in  $\text{CDCl}_3$

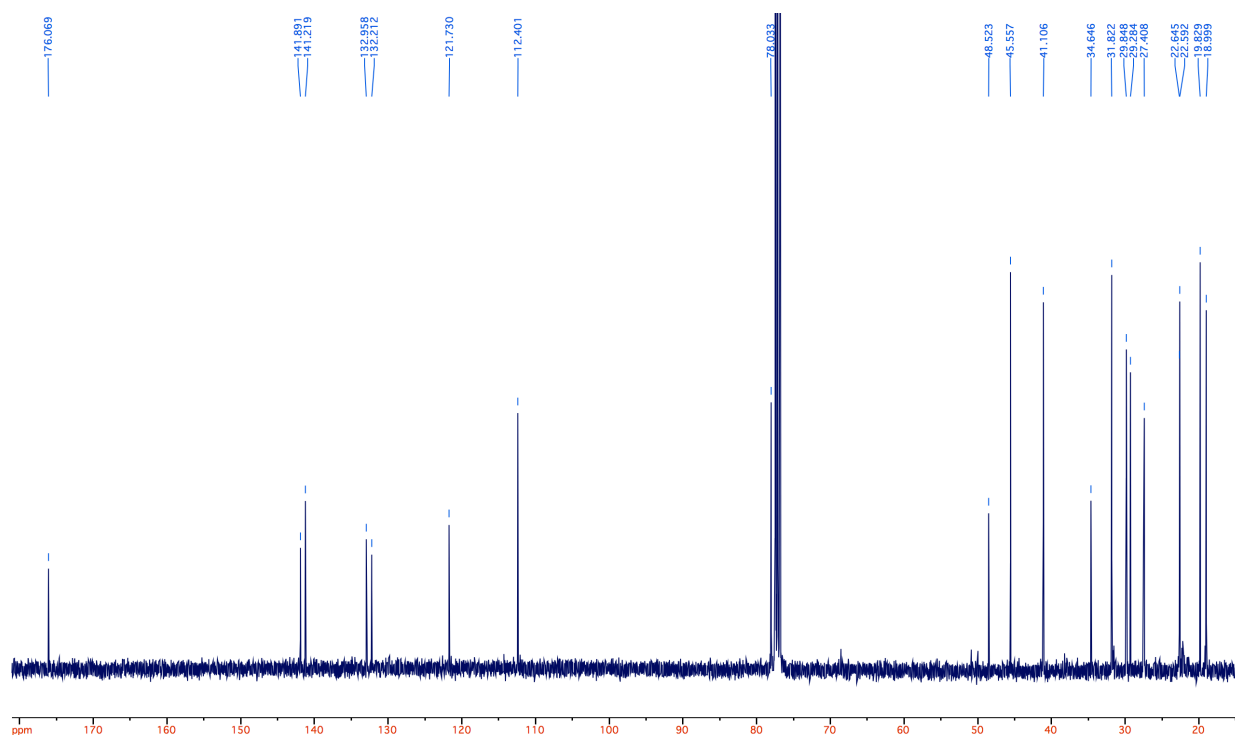

Figure S12.  $^{13}\text{C}$  NMR (100 MHz) spectrum of compound (7) in  $\text{CDCl}_3$
